# Supplementary material
Source: HighWire-hosted journal article supplement (https://bmjopen.bmj.com/content/15/1/e090818)
Supplement: inline-supplementary-material-1 [file inline-supplementary-material-1.pdf]

| Core Outcome Set-STANDARDISED Protocol (COS-STAP) Items |    |                                                                                                                                                                                                                                                                                       | Location                                |
|---------------------------------------------------------|----|---------------------------------------------------------------------------------------------------------------------------------------------------------------------------------------------------------------------------------------------------------------------------------------|-----------------------------------------|
| ABSTRACT                                                |    |                                                                                                                                                                                                                                                                                       |                                         |
| Title                                                   | 1a | Identify in the title that the paper describes the protocol for the planned development of a COS                                                                                                                                                                                      | Title                                   |
| Abstract                                                | 1b | Provide a structured abstract                                                                                                                                                                                                                                                         | Abstract                                |
| INTRODUCTION                                            |    |                                                                                                                                                                                                                                                                                       |                                         |
| Background and objectives                               | 2a | Describe the background and explain the rationale for developing the COS, and identify the reasons why a COS is needed and the potential barriers to its implementation                                                                                                               | Introduction: Background and objectives |
|                                                         | 2b | Describe the specific objectives with reference to developing a COS                                                                                                                                                                                                                   | Introduction: Background and objectives |
| Scope                                                   | 3a | Describe the health condition(s) and population(s) that will be covered by the COS                                                                                                                                                                                                    | Introduction: Scope                     |
|                                                         | 3b | Describe the intervention(s) that will be covered by the COS                                                                                                                                                                                                                          | Introduction: Scope                     |
|                                                         | 3c | Describe the context of use for which the COS is to be applied                                                                                                                                                                                                                        | Introduction: Scope                     |
| METHODS                                                 |    |                                                                                                                                                                                                                                                                                       |                                         |
| Stakeholders                                            | 4  | Describe the stakeholder groups to be involved in the COS development process, the nature of and rationale for their involvement and also how the individuals will be identified; this should cover involvement both as members of the research team and as participants in the study | Methods: Stakeholders                   |
| Information sources                                     | 5a | Describe the information sources that will be used to identify the list of outcomes. Outline the methods or reference other protocols/papers                                                                                                                                          | Methods: Information sources            |
|                                                         | 5b | Describe how outcomes may be dropped/combined, with reasons                                                                                                                                                                                                                           | Methods: Information sources (Stage 3)  |
| Consensus process                                       | 6  | Describe the plans for how the consensus process will be undertaken                                                                                                                                                                                                                   | Methods: Information sources (Stage 5)  |
| Consensus                                               | 7a | Describe the consensus definition                                                                                                                                                                                                                                                     | Methods: Information sources            |

|                                  |    |                                                                                                                                                                                                      |                                                            |
|----------------------------------|----|------------------------------------------------------------------------------------------------------------------------------------------------------------------------------------------------------|------------------------------------------------------------|
| definition                       |    |                                                                                                                                                                                                      | (Stage 5)                                                  |
|                                  | 7b | Describe the procedure for determining how outcomes will be added/combined/dropped from consideration during the consensus process                                                                   | Methods: Information sources (Stage 5)                     |
| ANALYSIS                         |    |                                                                                                                                                                                                      |                                                            |
| Outcome scoring/feedback         | 8  | Describe how outcomes will be scored and summarised, describe how participants will receive feedback during the consensus process                                                                    | Methods: Information sources (Stage 4)                     |
| Missing data                     | 9  | Describe how missing data will be handled during the consensus process                                                                                                                               | Methods: Information sources (Stage 4)                     |
| ETHICS and DISSEMINATION         |    |                                                                                                                                                                                                      |                                                            |
| Ethics approval/informed consent | 10 | Describe any plans for obtaining research ethics committee/institutional review board approval in relation to the consensus process and describe how informed consent will be obtained (if relevant) | Ethics and dissemination: Ethics approval/informed consent |
| Dissemination                    | 11 | Describe any plans to communicate the results to study participants and COS users, inclusive of methods and timing of dissemination                                                                  | Ethics and dissemination: Dissemination                    |
| ADMINISTRATIVE INFORMATION       |    |                                                                                                                                                                                                      |                                                            |
| Funders                          | 12 | Describe sources of funding, role of funders                                                                                                                                                         | Funding                                                    |
| Conflicts of interest            | 13 | Describe any potential conflicts of interest within the study team and how they will be managed                                                                                                      | Conflicts of interest                                      |
